# Supplementary material for: Identification, Phylogeny, and Comparative Expression of the Lipoxygenase Gene Family of the Aquatic Duckweed, Spirodela polyrhiza, during Growth and in Response to Methyl Jasmonate and Salt
Source: PubMed Central journal article supplement (PMC7765210; doi:10.3390/ijms21249527), 2020-12-15

# Identification, Phylogeny, and Comparative Expression of the Lipoxygenase Gene Family of the Aquatic Duckweed, *Spirodela polyrhiza*, during Growth and in Response to Methyl Jasmonate and Salt

Rakesh K. Upadhyay<sup>1\*</sup>, Marvin Edelman<sup>2</sup>, Autar K. Mattoo<sup>1\*</sup>

<sup>1</sup>Sustainable Agricultural Systems Laboratory, USDA-ARS, Henry A. Wallace Beltsville Agricultural Research Center, Beltsville, MD 20705-2350, USA; <sup>2</sup>Department of Plant and Environmental Sciences, Weizmann Institute of Science, Rehovot, 76100, Israel.

\* Authors for correspondences:

RKU ([rakesh.upadhyay@usda.gov](mailto:rakesh.upadhyay@usda.gov)); AKM ([autar.mattoo@usda.gov](mailto:autar.mattoo@usda.gov))

Supplementary Table 1: Gene sequences from plant species used to deduce evolutionary relatedness with the *Spirodela polyrhiza* LOX gene family.

Supplementary Table 2: List of genes and their primer sequences used for quantitative real– time PCR (qRT-PCR) analysis.

Supplementary Table 3: List of genes not considered as true LOXs\*.

Supplementary Table 4: *S. polyrhiza* LOXs within three released draft genome sequence.

Supplementary Figure 1: **Time dependent salt stress transcriptome analysis of LOX gene members in *Spirodela polyrhiza***

**Supplementary Table 1:** Gene sequences from plant species used to deduce evolutionary relatedness with the *Spirodela polyrhiza* LOX gene family

| Plant Species                        | Name   | Sequence ID    | Protein Length (aa) |
|--------------------------------------|--------|----------------|---------------------|
| Tomato<br>( <i>S. lycopersicum</i> ) | SILOX1 | Solyc08g014000 | 860                 |
|                                      | SILOX2 | Solyc01g099190 | 858                 |
|                                      | SILOX3 | Solyc01g006540 | 896                 |

|                                       |                                      |                  |                |     |
|---------------------------------------|--------------------------------------|------------------|----------------|-----|
|                                       | SILOX4                               | Solyc03g122340   | 908            |     |
|                                       | SILOX5                               | Solyc01g099160   | 862            |     |
|                                       | SILOX6                               | Solyc09g075860   | 877            |     |
|                                       | SILOX7                               | Solyc01g099200   | 841            |     |
|                                       | SILOX8                               | Solyc08g029000   | 861            |     |
|                                       | SILOX9                               | Solyc01g099180   | 854            |     |
|                                       | SILOX10                              | Solyc12g011040   | 892            |     |
|                                       | SILOX11                              | Solyc05g014790   | 911            |     |
|                                       | SILOX12                              | Solyc01g099210   | 902            |     |
|                                       | SILOX13                              | Solyc01g006560   | 863            |     |
|                                       | SILOX14                              | Solyc09g075870   | 854            |     |
|                                       | Duckweed<br>( <i>S. polyrrhiza</i> ) | SpLOX1           | Spipo2G0068200 | 868 |
|                                       |                                      | SpLOX2           | Spipo2G0068500 | 844 |
|                                       |                                      | SpLOX3           | Spipo4G0070100 | 806 |
| SpLOX4                                |                                      | Spipo7G0050500   | 916            |     |
| SpLOX5                                |                                      | Spipo15G0045200  | 792            |     |
| SpLOX6                                |                                      | Spipo28G0005500  | 904            |     |
| SpLOX7                                |                                      | Spipo28G0005600  | 904            |     |
| SpLOX8                                |                                      | Spipo28G0005700  | 637            |     |
| SpLOX9                                |                                      | Spipo0G0030100   | 920            |     |
| Arabidopsis<br>( <i>A. thaliana</i> ) | AtLOX1                               | At1g55020        | 859            |     |
|                                       | AtLOX2                               | At3g45140        | 896            |     |
|                                       | AtLOX3                               | At1g17420        | 919            |     |
|                                       | AtLOX4                               | At1g67560        | 917            |     |
|                                       | AtLOX5                               | At3g22400        | 886            |     |
|                                       | AtLOX6                               | At1g72520        | 926            |     |
| Rice<br>( <i>O. sativa</i> )          | OsLOX1                               | Os02g10120       | 925            |     |
|                                       | OsLOX2                               | Os02g19790       | 295            |     |
|                                       | OsLOX3                               | Os03g08220       | 918            |     |
|                                       | OsLOX4                               | Os03g49260       | 867            |     |
|                                       | OsLOX5                               | Os03g52860       | 870            |     |
|                                       | OsLOX6                               | Os03g52860       | 869            |     |
|                                       | OsLOX7                               | Os04g37430       | 797            |     |
|                                       | OsLOX8                               | Os05g23880       | 847            |     |
|                                       | OsLOX9                               | Os06g04420       | 125            |     |
|                                       | OsLOX10                              | Os08g39840       | 924            |     |
|                                       | OsLOX11                              | Os08g39850       | 941            |     |
|                                       | OsLOX12                              | Os11g36719       | 868            |     |
|                                       | OsLOX13                              | Os12g37260       | 922            |     |
|                                       | OsLOX14                              | Os12g37320       | 358            |     |
| Poplar<br>( <i>P. trichocarpa</i> )   | PtLOX1                               | Potri.001G015300 | 898            |     |
|                                       | PtLOX2                               | Potri.001G015400 | 902            |     |
|                                       | PtLOX3                               | Potri.001G015500 | 898            |     |
|                                       | PtLOX4                               | Potri.001G015600 | 898            |     |
|                                       | PtLOX5                               | Potri.001G167700 | 923            |     |
|                                       | PtLOX6                               | Potri.003G067600 | 925            |     |
|                                       | PtLOX7                               | Potri.005G032400 | 866            |     |
|                                       | PtLOX8                               | Potri.005G032600 | 796            |     |
|                                       | PtLOX9                               | Potri.005G032700 | 866            |     |
|                                       | PtLOX10                              | Potri.005G032800 | 863            |     |
|                                       | PtLOX11                              | Potri.008G151500 | 880            |     |
|                                       | PtLOX12                              | Potri.008G178000 | 827            |     |
|                                       | PtLOX13                              | Potri.009G022400 | 901            |     |
|                                       | PtLOX14                              | Potri.010G057100 | 926            |     |
|                                       | PtLOX15                              | Potri.010G089500 | 881            |     |
|                                       | PtLOX16                              | Potri.013G022000 | 871            |     |
|                                       | PtLOX17                              | Potri.013G022100 | 862            |     |
|                                       | PtLOX18                              | Potri.014G018200 | 860            |     |
|                                       | PtLOX19                              | Potri.014G177200 | 860            |     |
|                                       | PtLOX20                              | Potri.017G046200 | 898            |     |

**Supplementary Table 2:** List of genes and their primer sequences used for quantitative real– time PCR (qRT-PCR) analysis.

| Gene Name     | Sequence ID    | Forward Primer         | Reverse Primer         |
|---------------|----------------|------------------------|------------------------|
| <i>SpLOX1</i> | Spipo2G0068200 | TCCAGGATGTGCTGAACCTCTA | AACTCTTCATCGGTCTCCAAG  |
| <i>SpLOX2</i> | Spipo2G0068500 | TCGAGGTCAATCCCGATAGAGT | CGTCGGAGGATTGCCTATAAAC |
| <i>SpLOX3</i> | Spipo4G0070100 | CATGAACACCCTCTTCGACCT  | GTAGCCGTA CTGGCCGAAGTT |

|                 |                 |                          |                         |
|-----------------|-----------------|--------------------------|-------------------------|
| <i>SpLOX4</i>   | Spipo7G0050500  | ATCCTCACCACCATCATCTGGA   | TCCGGGATGAGCTTCTTCAT    |
| <i>SpLOX5</i>   | Spipo15G0045200 | CACTATCAAGGACTATCCCTACGC | TAGTGAGCTTCCACGTATCTGC  |
| <i>SpLOX6</i>   | Spipo28G0005500 | GTGGGCCATTACTATCCAGACC   | GGCTCTTTCCTCTTGTTCAGCAT |
| <i>SpLOX7</i>   | Spipo28G0005600 | CTATAAAGGCGGCCTACGAGAG   | CGGTTCTTCAGGTTCTGGTCTT  |
| <i>SpLOX8</i>   | Spipo28G0005700 | CTCCGTGAAGACGGTGAAATC    | TATAGCGGTAATGTGGGGGAAG  |
| <i>SpLOX9</i>   | Spipo0G0030100  | TGGTCGAAGGGTTCTACAGGTT   | TATGGAGATGCTGTTGGGGACT  |
| <i>Actin</i>    | Spipo17G0011400 | GGCTACTCCTTACCACCAC      | GCTCGTAGGTCTTCTCGACG    |
| <i>18S rRNA</i> | Spipo23G0000600 | CGGTCCTATTGTGTTGGCCT     | TCCTTGGCAAATGCTTTCGC    |

**Supplementary Table 3: List of Genes not considered as true LOXs\***

| <b>S.NO.</b> | <b>SGN IDs</b>  | <b>Protein (aa)</b> | <b>Loss or incomplete protein domains</b> |
|--------------|-----------------|---------------------|-------------------------------------------|
| 1            | Spipo0G0094800  | 209                 | No PLAT/LH2 domain; Truncated LOX domain  |
| 2            | Spipo0G0169900  | 109                 | Neither PLAT/LH2 nor LOX domain           |
| 3            | Spipo28G0005000 | 115                 | Neither PLAT/LH2 nor LOX domain           |
| 4            | Spipo28G0005100 | 325                 | No PLAT/LH2 domain                        |
| 5            | Spipo28G0005200 | 181                 | No PLAT/LH2 domain; Truncated LOX domain  |

|   |                 |     |                    |
|---|-----------------|-----|--------------------|
| 6 | Spipo28G0005300 | 376 | No PLAT/LH2 domain |
|---|-----------------|-----|--------------------|

\*Genes excluded lack the complete PLAT/LH2 domain (Polycystin-1, lipoxygenase,  $\alpha$ -toxin domain or lipoxygenase homology), LOX domain (Lipoxygenase) or have an incomplete/truncated PLAT/LH2 or LOX domain.

**Supplementary Table 4: *S. polyrhiza* LOXs within three released draft genome sequence assemblies<sup>a b c</sup>**

| Name | <i>S. polyrhiza</i> 7498v2 <sup>a</sup> | <i>S. polyrhiza</i> 9509 <sup>b</sup><br>Chromosome position | <i>S. polyrhiza</i> 7498v3 <sup>c</sup><br>sequence coordinates |
|------|-----------------------------------------|--------------------------------------------------------------|-----------------------------------------------------------------|
|------|-----------------------------------------|--------------------------------------------------------------|-----------------------------------------------------------------|

|               |                 |                                      |                                 |
|---------------|-----------------|--------------------------------------|---------------------------------|
| <i>SpLOX1</i> | Spipo2G0068200  | Chr. 4 (CP019096.1: 3595583-3599560) | SWLF01000117.1: 5138474-5142450 |
| <i>SpLOX2</i> | Spipo2G0068500  | Chr. 4 (CP019096.1:3581789-3586763)  | SWLF01000117.1: 5151172-5156496 |
| <i>SpLOX3</i> | Spipo4G0070100  | Chr. 1 (CP019093.1: 8606937-8610643) | SWLF01000080.1: 6149775-6153490 |
| <i>SpLOX4</i> | Spipo7G0050500  | Chr. 7 (CP019099.1:1639963-1645308)  | SWLF01000027.1: 1630557-1635868 |
| <i>SpLOX5</i> | Spipo15G0045200 | Chr. 15 (CP019107.1:780100-782904)   | SWLF01000108.1: 3932970-3935770 |
| <i>SpLOX6</i> | Spipo28G0005500 | Chr. 9 (CP019101.1:5602359- 5606311) | SWLF01000039.1: 7035417-7039363 |
| <i>SpLOX7</i> | Spipo28G0005600 | Chr. 9 (CP019101.1:5565220-5569201)  | SWLF01000039.1: 7051551-7055538 |
| <i>SpLOX8</i> | Spipo28G0005700 | Chr. 9 (CP019101.1:5628591-5635242)  | SWLF01000039.1:7061876-7067673  |
| <i>SpLOX9</i> | Spipo0G0030100  | Chr. 15 (CP019107.1:481984-485572)   | SWLF01000108.1:4227121-4230719  |

- a) *S. polyrhiza*7498 v2 (Spirodela polyrhiza at Phytozome v13; GenBank assembly accession: GCA\_000504445.1) [13]
- b) *S. polyrhiza*9509 v3 (BioProject: PRJNA308109; GenBank assembly accession: GCA\_900492545.1) [50]
- c) *S. polyrhiza*7498 v3 (BioProject: PRJNA520740; GenBank assembly accession: GCA\_008360905.1) [17]

**Supplementary Figure 1: Time dependent salt stress transcriptome analysis of LOX gene members in *Spirodela polyrhiza*.** An earlier study [61] reported that salt stress (100mM) down regulates the expression of *SpLOX1*, *SpLOX5* and *SpLOX8* genes. The FPKM fold changes reported are presented below as heat map.

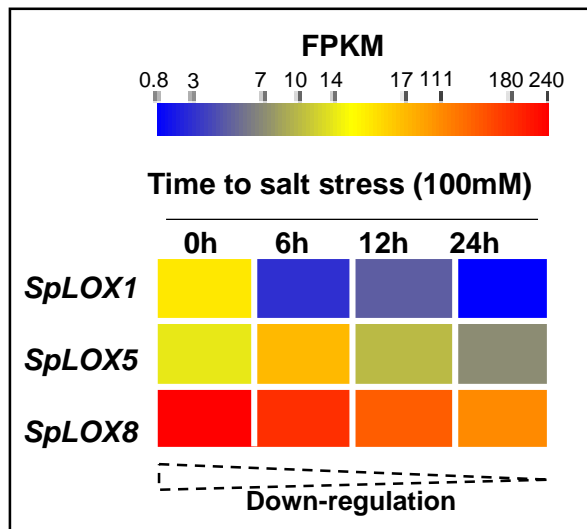

Supplement: ijms-21-09527-s001.pdf [file ijms-21-09527-s001.pdf]
